# Supplementary material
Source: publisher figshare collection journal article supplement (https://acs.figshare.com/ndownloader/files/5977155)
Supplement: Supplementary file 1 [file 5977155]

## Supporting Information for Publication

### Discovery of a Potent, Selective and Cell-active Dual Inhibitor of Protein Arginine Methyltransferase 4 and Protein Arginine Methyltransferase 6

Yudao Shen,<sup>†,#</sup> Magdalena M. Szewczyk,<sup>‡,#</sup> Mohammad S. Eram,<sup>‡,#</sup> David Smil,<sup>‡</sup> H. Ümit Kaniskan,<sup>†</sup> Renato Ferreira de Freitas,<sup>‡</sup> Guillermo Senisterra,<sup>‡</sup> Fengling Li,<sup>‡</sup> Matthieu Schapira,<sup>‡,§</sup> Peter J. Brown,<sup>‡</sup> Cheryl H. Arrowsmith,<sup>‡,⊥</sup> Dalia Barsyte-Lovejoy,<sup>‡</sup> Jing Liu,<sup>\*,†</sup> Masoud Vedadi,<sup>\*,‡,§</sup> and Jian Jin<sup>\*,†</sup>

#### Table of Contents

|    |                                                                                                                     |     |
|----|---------------------------------------------------------------------------------------------------------------------|-----|
| A. | <sup>1</sup> H and <sup>13</sup> C NMR spectra of MS049 ( <b>17</b> )                                               | S2  |
| B. | Supporting Table S1. Selectivity of <b>17</b> against a panel of 9 methyllysine and methylarginine reader proteins. | S3  |
| C. | Supporting Table S2. Selectivity of <b>17</b> against the CEREP panel.                                              | S4  |
| D. | Supporting Table S3. Selectivity of <b>17</b> against the PDSP panel.                                               | S6  |
| E. | Supporting Scheme S1. Synthesis of <b>46</b> .                                                                      | S7  |
| F. | Supporting Figure S1. Selectivity of <b>17</b> against KDMs.                                                        | S8  |
| G. | Supporting Figure S2. Effect of <b>46</b> on inhibiting PRMT6 and PRMT4 in cells.                                   | S9  |
| H. | Supporting Figure S3. Effect of <b>17</b> and inactive control <b>46</b> on cell growth.                            | S10 |
| I. | Supporting Figure S4. Mechanism of inhibition of PRMT4 and PRMT6 activity by sinefungin.                            | S11 |

# NMR spectra of compound **17**:

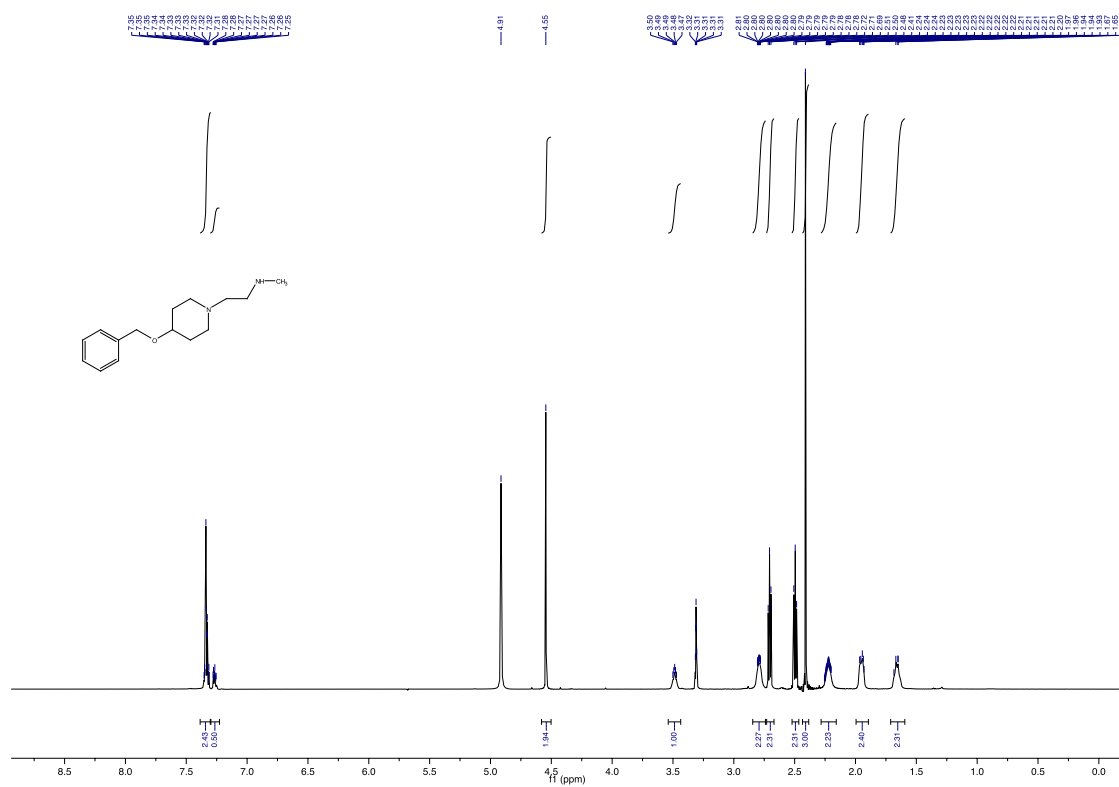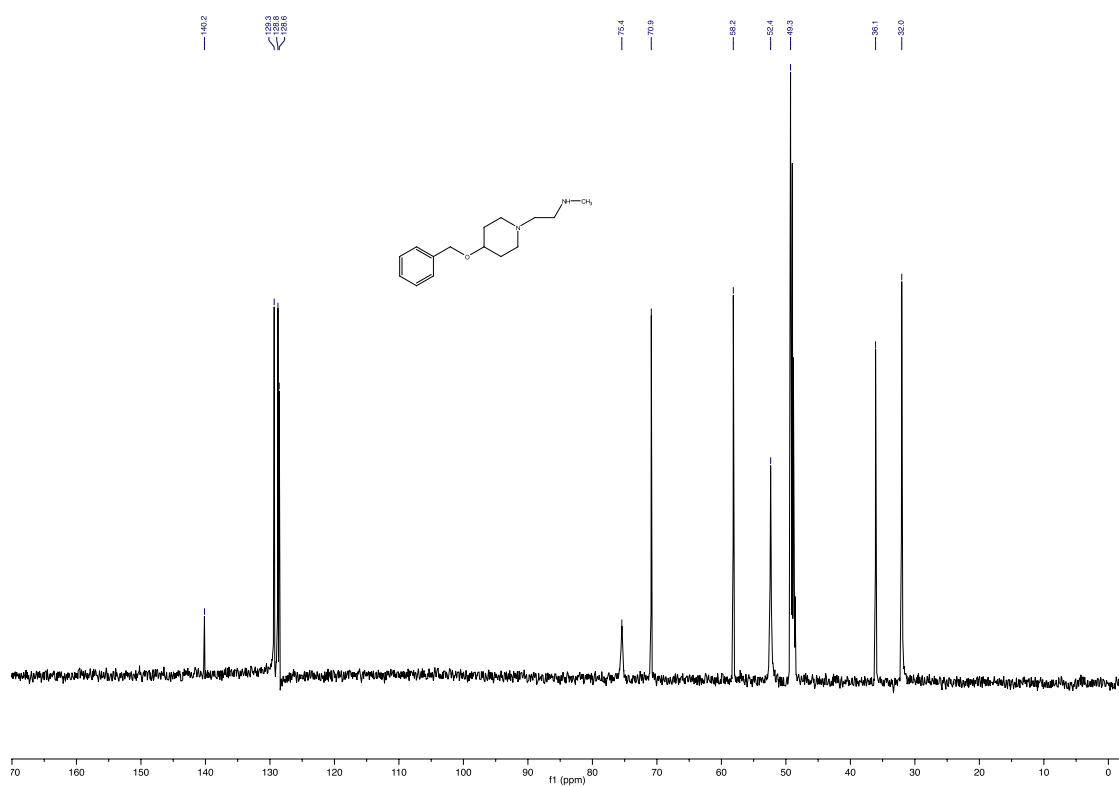

**Supporting Table S1. Selectivity of 17 against a panel of 9 methyllysine and methylarginine reader proteins.** Compound **17** did not stabilize any of these proteins at 200  $\mu$ M indicating no binding ( $\Delta T_m$  and  $\Delta T_{agg} \leq 1$   $^{\circ}$ C).

| Binder protein | DSF                          | DSLS                             |
|----------------|------------------------------|----------------------------------|
|                | $\Delta T_m$ ( $^{\circ}$ C) | $\Delta T_{agg}$ ( $^{\circ}$ C) |
| UHRF1          | 0                            | 1                                |
| BRPF1          | 0.7                          | 0.8                              |
| WDR5           | 0                            | 0                                |
| HGDF2          | -2.5                         | 0.4                              |
| TDRD3          | NA                           | -0.4                             |
| RBBP1          | NA                           | 0.7                              |
| FXR1           | NA                           | 0.4                              |
| EED            | NA                           | -0.2                             |
| SND1           | NA                           | 0.4                              |

**Supporting Table S2. Selectivity of 17 against the CEREP panel.** Compound 17 showed no appreciable inhibition (no more than 50% inhibition at 10,000 nM) against 100 GPCRs, ion channels, transporters, and kinases.

| Target                                              | 10 $\mu$ M 17<br>% Inhibition | Target                                                           | 10 $\mu$ M 17<br>% Inhibition |
|-----------------------------------------------------|-------------------------------|------------------------------------------------------------------|-------------------------------|
| A1 (h) (antagonist radioligand)                     | 5                             | Na <sup>+</sup> channel (site 2)<br>(antagonist radioligand)     | 31                            |
| A2A (h) (agonist radioligand)                       | -4                            | Cl <sup>-</sup> channel (GABA-gated)<br>(antagonist radioligand) | 3                             |
| A3 (h) (agonist radioligand)                        | -11                           | norepinephrine transporter (h)<br>(antagonist radioligand)       | 23                            |
| alpha 1 (non-selective)<br>(antagonist radioligand) | 11                            | dopamine transporter (h)<br>(antagonist radioligand)             | 17                            |
| alpha 2 (non-selective)<br>(antagonist radioligand) | -3                            | 5-HT transporter (h)<br>(antagonist radioligand)                 | 20                            |
| beta 1 (h) (agonist radioligand)                    | 9                             | Abl kinase (h)                                                   | -19                           |
| beta 2 (h) (agonist radioligand)                    | 6                             | Akt1/PKBalpha (h)                                                | 5                             |
| AT1 (h) (antagonist radioligand)                    | -4                            | AurA/Aur2 kinase (h)                                             | -2                            |
| BZD (central) (agonist<br>radioligand)              | -2                            | CaMK2alpha (h)                                                   | -3                            |
| B2 (h) (agonist radioligand)                        | 7                             | CDC2/CDK1 (h) (cycB)                                             | -2                            |
| CB1 (h) (agonist radioligand)                       | 11                            | CDK2 (h) (cycA)                                                  | 10                            |
| CCK1 (CCKA) (h) (agonist<br>radioligand)            | 6                             | CHK1 (h)                                                         | 10                            |
| D1 (h) (antagonist radioligand)                     | 3                             | CHK2 (h)                                                         | 3                             |
| D2S (h) (antagonist radioligand)                    | -2                            | c-Met kinase (h)                                                 | -2                            |
| ETA (h) (agonist radioligand)                       | 10                            | EGFR kinase (h)                                                  | 9                             |
| GABA (non-selective) (agonist<br>radioligand)       | -8                            | EphA2 kinase (h)                                                 | -2                            |
| GAL2 (h) (agonist radioligand)                      | -8                            | EphA3 kinase (h)                                                 | -12                           |
| CXCR2 (IL-8B) (h) (agonist<br>radioligand)          | 12                            | EphB4 kinase (h)                                                 | 8                             |
| CCR1 (h) (agonist radioligand)                      | -1                            | ERK2 (h) (P42mapk)                                               | 46                            |
| H1 (h) (antagonist radioligand)                     | 24                            | FGFR1 kinase (h)                                                 | -4                            |
| H2 (h) (antagonist radioligand)                     | 1                             | FGFR2 kinase (h)                                                 | 4                             |
| MC4 (h) (agonist radioligand)                       | 19                            | FGFR3 kinase (h)                                                 | -14                           |
| MT1 (ML1A) (h) (agonist<br>radioligand)             | 6                             | GSK3beta (h)                                                     | 2                             |
| M1 (h) (antagonist radioligand)                     | 17                            | HGK (h) (MAP4K4)                                                 | -6                            |
| M2 (h) (antagonist radioligand)                     | 23                            | IKKalpha (h)                                                     | -2                            |
| M3 (h) (antagonist radioligand)                     | 40                            | IRAK4 (h)                                                        | 1                             |
| NK2 (h) (agonist radioligand)                       | -7                            | IRK (h) (InsR)                                                   | -10                           |
| NK3 (h) (antagonist radioligand)                    | -15                           | JAK3 (h)                                                         | -8                            |
| Y1 (h) (agonist radioligand)                        | 4                             | JNK1 (h)                                                         | -6                            |
| Y2 (h) (agonist radioligand)                        | -15                           | KDR kinase (h) (VEGFR2)                                          | -7                            |
| NTS1 (NT1) (h) (agonist)                            | -7                            | Lck kinase (h)                                                   | 4                             |

|                                                                              |     |                     |    |
|------------------------------------------------------------------------------|-----|---------------------|----|
| radioligand)                                                                 |     |                     |    |
| delta (DOP) (h) (agonist radioligand)                                        | -10 | MAPKAPK2 (h)        | 10 |
| kappa (KOP) (agonist radioligand)                                            | 11  | MARK1 (h)           | 2  |
| mu (MOP) (h) (agonist radioligand)                                           | 4   | MNK2 (h)            | -1 |
| NOP (ORL1) (h) (agonist radioligand)                                         | -5  | NEK2 (h)            | -1 |
| EP4 (h) (agonist radioligand)                                                | -10 | p38alpha kinase (h) | -1 |
| 5-HT1A (h) (agonist radioligand)                                             | -2  | PAK2 (h)            | -2 |
| 5-HT1B (antagonist radioligand)                                              | -1  | PAK4 (h)            | -7 |
| 5-HT2A (h) (antagonist radioligand)                                          | 13  | PDK1 (h)            | -5 |
| 5-HT2B (h) (agonist radioligand)                                             | 10  | Pim2 kinase (h)     | 5  |
| 5-HT3 (h) (antagonist radioligand)                                           | 5   | PKA (h)             | 7  |
| 5-HT5a (h) (agonist radioligand)                                             | -6  | PKCbeta 2 (h)       | -1 |
| 5-HT6 (h) (agonist radioligand)                                              | 11  | PLK1 (h)            | 29 |
| 5-HT7 (h) (agonist radioligand)                                              | 16  | RAF-1 kinase (h)    | 1  |
| sst (non-selective) (agonist radioligand)                                    | -1  | ROCK1 (h)           | 1  |
| VPAC1 (VIP1) (h) (agonist radioligand)                                       | -5  | SGK1 (h)            | -7 |
| V1a (h) (agonist radioligand)                                                | 12  | SIK (h)             | 6  |
| Ca2+ channel (L, verapamil site) (phenylalkylamine) (antagonist radioligand) | 19  | Src kinase (h)      | 0  |
| KV channel (antagonist radioligand)                                          | -24 | TAOK2 (TAO1) (h)    | 28 |
| SKCa channel (antagonist radioligand)                                        | -8  | TRKA (h)            | 3  |

**Supporting Table S3. Selectivity of 17 against the PDSP panel.** Compound 17 showed no more than 50% inhibition at 10,000 nM against 41 targets and >50% inhibition at 10,000 nM against 3 targets in the panel.

| Target             | 10 $\mu$ M 17<br>% Inhibition ( $K_i$ ) | Target  | 10 $\mu$ M 17<br>% Inhibition ( $K_i$ ) |
|--------------------|-----------------------------------------|---------|-----------------------------------------|
| 5-HT1A             | 2                                       | D2      | 33                                      |
| 5-HT1B             | 1                                       | D3      | 2                                       |
| 5-HT1D             | 5                                       | D4      | 17                                      |
| 5-HT1e             | 11                                      | D5      | 3                                       |
| 5-HT2A             | 5                                       | DAT     | 45                                      |
| 5-HT2B             | 8                                       | DOR     | -1                                      |
| 5-HT2C             | -4                                      | GABAA   | -10                                     |
| 5-HT3              | 8                                       | H2      | 7                                       |
| 5-HT5a             | 17                                      | H3      | 88 (87 nM)                              |
| 5-HT6              | 7                                       | H4      | -14                                     |
| 5-HT7              | 7                                       | KOR     | -10                                     |
| Alpha1A            | 6                                       | M1      | 3                                       |
| Alpha1B            | 7                                       | M2      | 3                                       |
| Alpha1D            | 14                                      | M3      | 16                                      |
| Alpha2A            | 18                                      | M4      | 13                                      |
| Alpha2B            | -4                                      | M5      | -6                                      |
| Alpha2C            | 10                                      | MOR     | 7                                       |
| Beta1              | -15                                     | NET     | 42                                      |
| Beta2              | -11                                     | PBR     | 38                                      |
| Beta3              | -14                                     | SERT    | 16                                      |
| BZP Rat Brain Site | -5                                      | Sigma 1 | 97 (64 nM)                              |
| D1                 | -10                                     | Sigma 2 | 85 (574 nM)                             |

**Supporting Scheme S1. Synthesis of 46.**

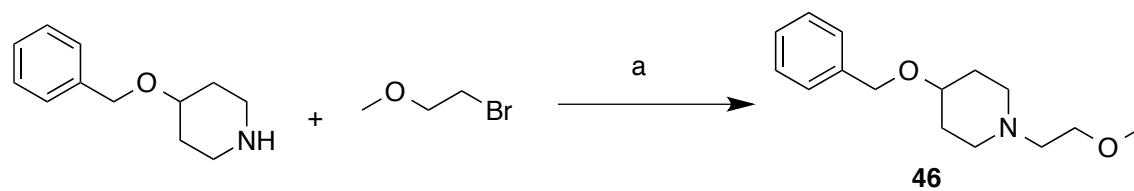

Reagents and conditions: (a) K<sub>2</sub>CO<sub>3</sub>, KI, CH<sub>3</sub>CN, reflux, 20%.

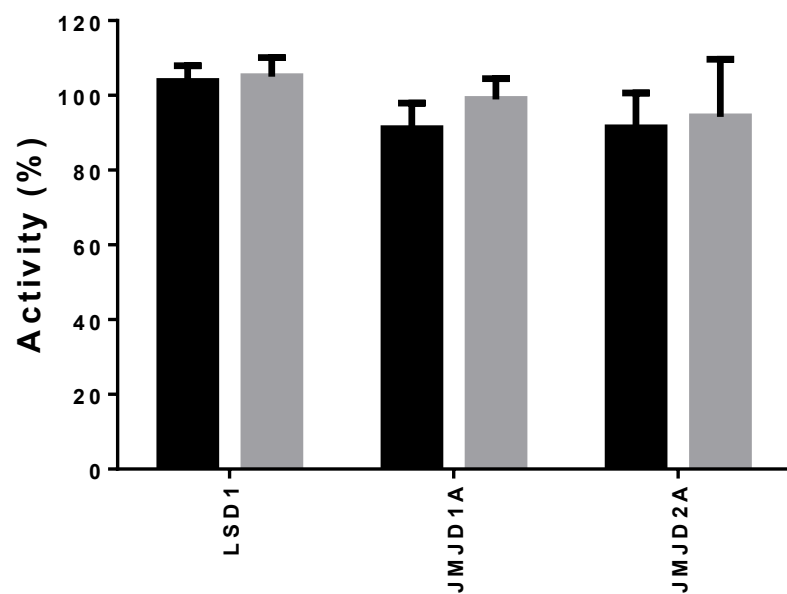

**Supporting Figure S1. Selectivity of 17 against KDMs.** The inhibitory effect of **17** was tested against KDM1A (LSD1), KDM3A (JMJD1A), and KDM4A (JMJD2A) at two compound concentrations of 1  $\mu$ M (■) and 10  $\mu$ M (■).



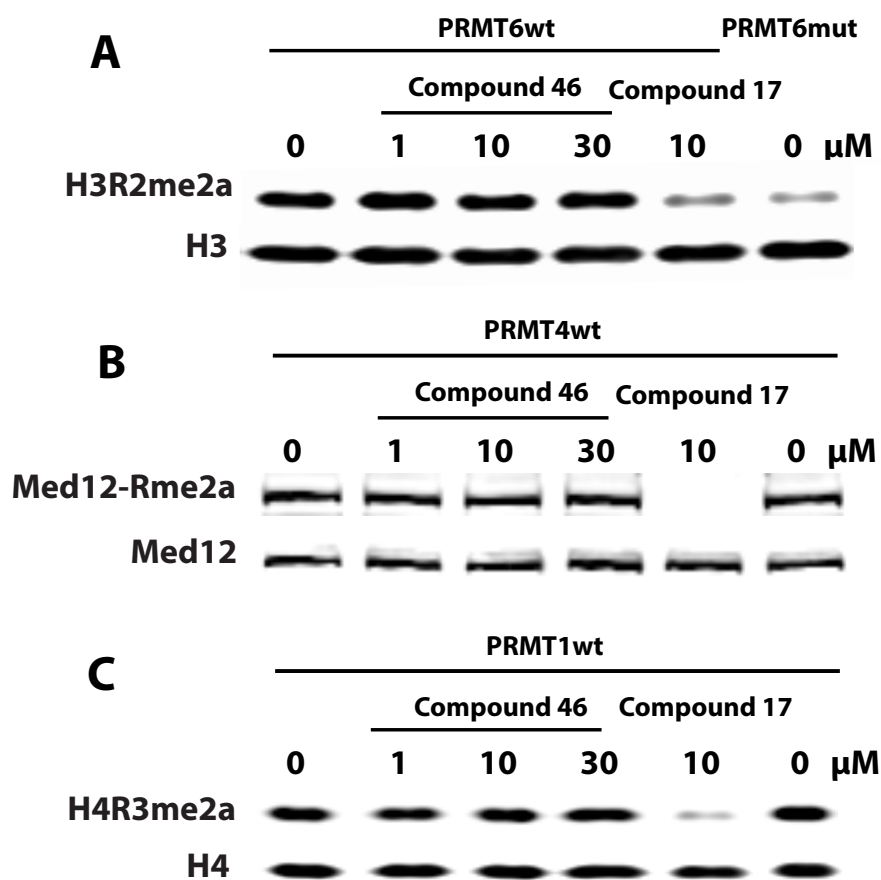

**Supporting Figure S2. Effect of 46 on inhibiting PRMT6 and PRMT4 in cells.** Compound 46 was tested in triplicates and representative gels are shown. (A) Compound 46 does not inhibit PRMT6 methyltransferase activity in HEK293 cells. HEK293 cells were transfected with FLAG-tagged PRMT6 (wt) or its catalytically inactive mutant V86K/D88A (mut) and treated with 46 at indicated concentrations for 20 h. H3R2me2a and total H3 levels were determined by Western blot. (B) Compound 46 does not inhibit endogenous PRMT4 methyltransferase activity in HEK293 cells. HEK293 cells were treated with 46 at indicated concentrations for 72 h and Med12-Rme2a and total Med12 levels were determined by Western blot. (C) Compound 46 does not inhibit endogenous PRMT1 methyltransferase activity in HEK293 cells while compound 17 reduces cellular levels of H4R3me2a. HEK293 cells were treated with 46 or 17 at indicated concentrations for 72 h and H4R3me2a and total H4 levels were determined by Western blot.

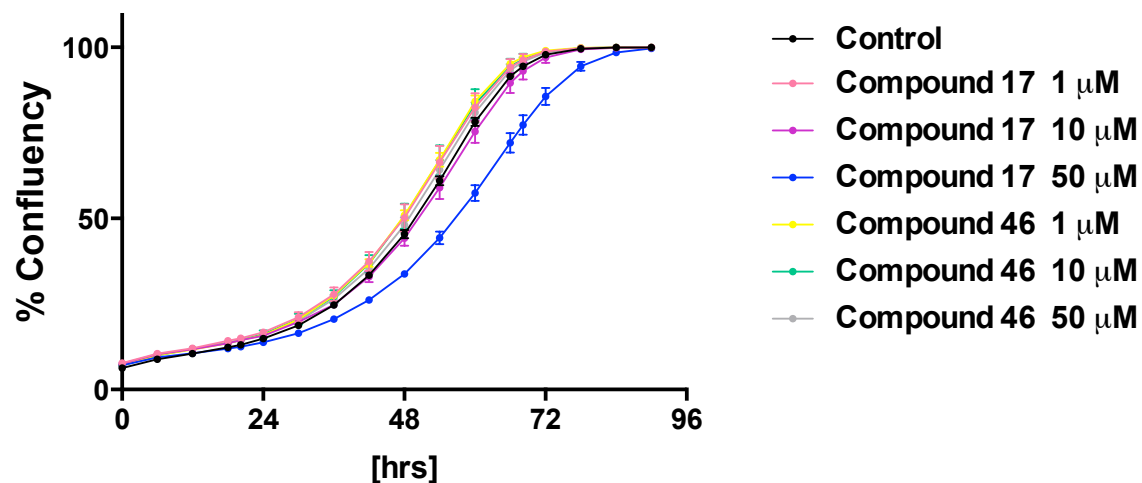

**Supporting Figure S3. Effect of 17 and inactive control 46 on cell growth.** HEK293 cells were grown in presence of indicated concentrations of probes for 4 days. Cell confluency was measured using IncuCyte™ ZOOM live cell imaging device. The values are MEAN  $\pm$  SEM (n = 4).

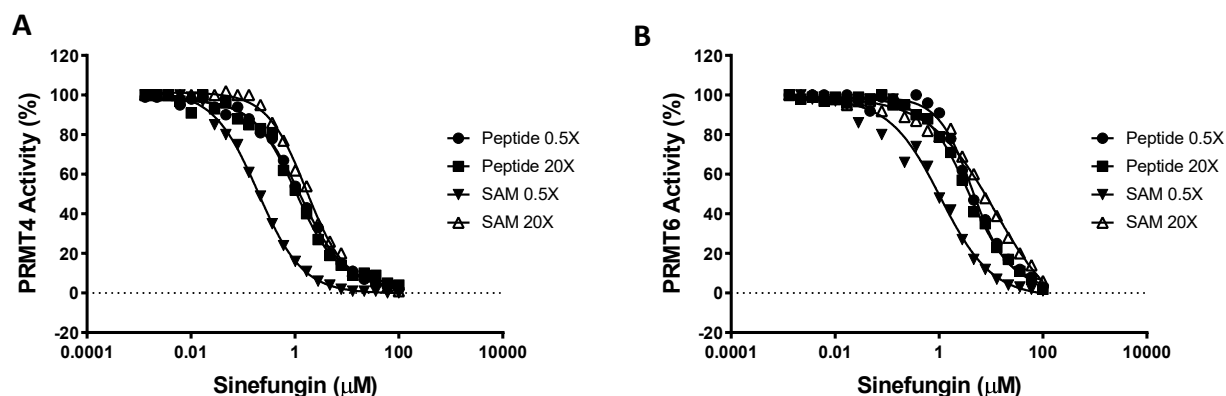

**Supporting Figure S4. Mechanism of inhibition of PRMT4 and PRMT6 activity by sinefungin.** Along with attempts to determine the mechanism of action (MOA) of MS049, we used sinefungin as a control. Here we show that SAM competitive mechanism of action of sinefungin in inhibiting PRMT4 (**A**) and PRMT6 (**B**) can easily be confirmed by determining  $\text{IC}_{50}$  values at SAM concentrations ranging from below  $K_m$  ( $0.5 \times K_m$ ) to saturation ( $20 \times K_m$ ) which resulted in an increase in  $\text{IC}_{50}$  values from  $0.2 \mu\text{M}$  to  $1.7 \mu\text{M}$  with PRMT4 and  $1 \mu\text{M}$  to  $12 \mu\text{M}$  for PRMT6. For both proteins no significant change in  $\text{IC}_{50}$  values were observed when the concentration of peptide substrate was increased from  $0.5 \times$  the  $K_m$  of peptide substrate to  $20 \times K_m$  of peptide ( $\text{IC}_{50}$  values of  $1.2 \mu\text{M}$  and  $1.1 \mu\text{M}$  for PRMT4 and  $4.3$  and  $3.8 \mu\text{M}$  for PRMT6) indicating that sinefungin doesn't compete with peptide substrate as expected.
